# Supplementary material for: Annotation of susceptibility SNPs associated with atrial fibrillation
Source: Aging (Albany NY). 2020 Sep 9;12(17):16981–98. doi: 10.18632/aging.103615 (PMC7521544; doi:10.18632/aging.103615)
Supplement: Supplementary Table 1 [file aging-12-103615-s001..xlsx]

## Sheet: Sheet1
Supplementary Table 1. Information of susceptibility SNPs associated with atrial fibrillation.
SNP	Position(Hg19)	Minor Allele	AFR Frequency (1000genomes)	EAS Frequency (1000genomes)	EUR Frequency (1000genomes)	Genomic annotation	Catolog（*1，Missense/splicing；2，UTR；3，Promoter；4，Intronic；5，Inter	PMID	Enhancer	Promoter	Predicted Transcription Factors	3D interacting gene	Linear closest gene
rs10006327	chr4:103890980-103890980	T	0.8979	0.5129	0.492	upstream_gene_variant	5	30061737				UBE2D3	SLC9B1
rs10027347	chr4:148946690-148946690	T	0.1346	0.0565	0.0567	intron_variant	4	30061737	2
rs10033464	chr4:111720761-111720761	G	0.8086	0.745	0.9026	intron_variant	4	29892015	2
rs10165883	chr2:70117015-70117015	T	0.9327	0.6478	0.4433	downstream_gene_variant	5	29240960			TP53,NFATC2	ANXA4
rs10213171	chr4:148937537-148937537	G	0.3071	0.0556	0.0577	upstream_gene_variant	5	29892015	9
rs10428132	chr3:38819044-38819044	G	0.8812	0.7927	0.5835	intron_variant	4	29892015				SCN10A	SCN10A
rs1044258	chr10:103605714-103605714	C	0.0605	0.2361	0.3449	intron	4	24667784	6		Zfx	FGF8	C10orf76,KCNIP2
rs10458660	chr10:77936576-77936576	G	0.1513	0.5069	0.1918	upstream_gene_variant	5	29892015	1
rs10465885	chr1:147232740-147232740	T	0.6377	0.4623	0.498	intron_variant	4	30061737	21	6	NFIC	GJA5	GJA5
rs10479177	chr5:137388440-137388440	G	0.2829	0.3859	0.2674	intron_variant	4	30061737			SOX10
rs1049334	chr7:116200380-116200380	A	0.056	0.1944	0.0855	upstream_gene_variant	5	29892015	41		ZNF263,ESR1	TES	CAV1
rs10501920	chr11:99493173-99493173	G	0.2284	0.1994	0.0915	3_prime_UTR_variant	2	28416822	1
rs10501920	chr11:99493173-99493173	G	0.2284	0.1994	0.0915	intron_variant	4	17903304	1
rs10504554	chr8:74919713-74919713	C	0.5371	0.1111	0.1938	intron_variant	4	17903304			Rxra
rs10507248	chr12:114797093-114797093	T	0.6036	0.4157	0.7227	intron_variant	4	26385043
rs10507539	chr13:46834706-46834706	A	0.1891	0.3849	0.339	intron_variant	4	25124494				LCP1	LRRC63
rs10520260	chr4:174447349-174447349	G	0.1339	0.2232	0.2783	intron_variant	4	17903304	3	10	ESR1	CEP44	HAND2
rs10741807	chr11:20011445-20011445	C	0.5008	0.4821	0.7694	3_prime_UTR_variant	2	29892015	6			NAV2	NAV2
rs10749053	chr10:112576695-112576695	C	0.6793	0.9613	0.8618	intron_variant	4	30061737	27			PDCD4	RBM20
rs10753933	chr1:203026214-203026214	G	0.2761	0.3909	0.5567	intron_variant	4	29892015	12		REST	PPFIA4	PPFIA4
rs10760361	chr9:127178266-127178266	T	0.379	0.2173	0.327	intron_variant	4	29892015	14	13	EGR1,SP2	MIR181B2	PSMB7
rs10773657	chr12:123327900-123327900	A	0.6437	0.7569	0.8648	upstream_gene_variant	5	29892015	38	2	Prrx2	HIP1R	HIP1R
rs10786662	chr10:103989812-103989812	C	0.6467	0.7986	0.5358	intron_variant	4	29892015	69	35	NFATC2	ELOVL3	PITX3,ELOVL3
rs10800507	chr1:170185641-170185641	G	0.4402	0.2798	0.5437	downstream_gene_variant	5	29892015	1
rs10804493	chr3:111554426-111554426	A	0.329	0.5536	0.675	intron_variant , non_coding_transcript_variant	4	28416818				PHLDB2	PHLDB2,PLCXD2
rs10821415	chr9:97713459-97713459	A	0.1868	0.2758	0.4016	intron_variant	4	30061737	83	5		MIR2278	C9orf3
rs10824026	chr10:75421208-75421208	A	0.2549	0.6597	0.84	intron_variant	4	22544366	14	1	Stat6
rs10842383	chr12:24771967-24771967	T	0.0091	0.1349	0.1551	intron_variant	4	22544366	1			LINC00477
rs10873298	chr14:77426525-77426525	T	0.0272	0.7153	0.5716	intergenic_variant	5	29892015	39	8	Stat6	IRF2BPL
rs10873299	chr14:77426711-77426711	G	0.0272	0.7153	0.5716	intron_variant , non_coding_transcript_variant	4	30061737	39	9	ZNF263,NFIC	IRF2BPL
rs11001667	chr10:77935345-77935345	G	0.1467	0.505	0.1899	intron_variant , non_coding_transcript_variant	4	29892015	2
rs11015781	chr10:18994583-18994583	T	0.1188	0.377	0.3439	intron_variant	4	29892015
rs11047543	chr12:24941272-24941272	A	0.0219	0.1349	0.1551	upstream_gene_variant	5	26385043	2			LINC00477
rs11125871	chr2:61470126-61470126	T	0.2632	0.3532	0.3708	intron	4	22336519	2		Foxq1,Sox5	AHSA2	USP34
rs11156751	chr14:32990437-32990437	C	0.1944	0.3839	0.3201	intron_variant	4	30061737				DTD2	AKAP6
rs11180703	chr12:76223817-76223817	A	0.0825	0.2579	0.4712	intron_variant	4	30061737	4			PHLDA1
rs11231397	chr11:62951221-62951221	G	0.2617	0.5317	0.3946	intron_variant , non_coding_transcript_variant	4	29892015				SLC22A24	SLC22A25
rs112599895	chr4:111656592-111656592	G			0.0179	stop_lost , NMD_transcript_variant	1	28849223
rs11264280	chr1:154862952-154862952	T	0.1051	0.0923	0.3091	intergenic_variant	5	29892015			ZNF263	ADAR
rs11265611	chr1:154367600-154367600	A	0.587	0.4464	0.5726	intergenic_variant	5	29892015	66	2		IL6R	IL6R
rs113710653	chr21:47581835-47581835	T	0.0106	0.0139	0.0964	intron	4	24239840	6			COL6A1	SPATC1L
rs113819537	chr12:26348429-26348429	G	0.087	0.3661	0.2594	missense_variant	1	28849223	7	83	ZNF263
rs114904067	chr4:112604821-112604821	A	0.2118		0.0258	5_prime_UTR_variant	2	29892015
rs115155878	chr3:114055988-114055988	C	0.0386	0.001	0.0139	3_prime_UTR_variant	2	30678657
rs1152591	chr14:64680848-64680848	G	0.9319	0.7371	0.5427	intergenic_variant	5	30061737	5	5	Myc,MAX	SYNE2	SYNE2
rs11552708	chr17:7462555-7462555	A	0.084	0.3026	0.1004	intron_variant	4	22544366	41	50	ZNF263	TNFSF12-TNFSF13	TNFSF13,TNFSF12,TNFSF12-TNFSF13
rs11590635	chr1:49309764-49309764	A	0.0008		0.0229	intron_variant	1	28849223	2
rs11598047	chr10:105342672-105342672	G	0.0991	0.1637	0.1491	intron_variant	4	30061737	7	1	Klf1,Klf4
rs11614818	chr12:56055815-56055815	T	0.1036	0.377	0.662	intron_variant	4	29892015
rs11658278	chr17:38031164-38031164	C	0.3971	0.2827	0.508	upstream_gene_variant	5	30061737			Nr1h3_Rxra	GSDMB	ZPBP2
rs11708215	chr3:148661050-148661050	G	0.1354	0.3155	0.1909	intron_variant	4	29892015	40	66		HPS3	LOC101927942
rs11708996	chr3:38675413-38675413	C	0.0182	0.0188	0.1461	intronloc	4	24118451				SCN5A	SCN5A
rs11768850	chr7:876227-876227	T	0.3177	0.5159	0.4155	intron	4	24667784	52	3	RORA_2	SUN1	SUN1
rs11773845	chr7:116191301-116191301	A	0.2973	0.7252	0.6034	intron_variant	4	29892015	23		Bcl6	CAV2	CAV1
rs11773884	chr7:92285123-92285123	G	0.5265	0.1468	0.3449	intron_variant	4	29892015	10		RUNX2,INSM1	CDK6	CDK6
rs117984853	chr6:149399100-149399100	T	0.0008	0.001	0.0805	intron_variant	4	29892015	7			SUMO4	UST
rs118159104	chr16:1676804-1676804	G			0.0149	downstream_gene_variant	5	29892015	5
rs11846704	chr14:35186694-35186694	T	0.4508	0.9008	0.2823	intron_variant	4	30061737				CFL2
rs12044963	chr1:112392360-112392360	T	0.0393	0.4385	0.0924	upstream_gene_variant	5	29892015	12		ARID3A	LOC643355	KCND3
rs12122060	chr1:170193859-170193859	A	0.0023	0.003	0.0994	intron_variant	4	29892015	1
rs12129500	chr1:154423764-154423764	C	0.705	0.4276	0.5487	intron_variant , non_coding_transcript_variant	4	29892015			Myb	IL6R	IL6R
rs12142379	chr1:170693538-170693538	C	0.0045	0.002	0.0666	intron_variant	4	29892015
rs12188351	chr5:168386089-168386089	A	0.0015	0.0317	0.0606	intron_variant	4	29892015				MIR218-2	SLIT3
rs12208899	chr6:133474303-133474303	A	0.0121	0.1647	0.1809	intron_variant	4	30061737
rs12245149	chr10:65321147-65321147	A	0.528	0.2768	0.4861	downstream_gene_variant	5	29892015	7	1	HOXA5	REEP3	REEP3
rs12298484	chr12:124418674-124418674	T	0.3116	0.129	0.3678	intron_variant	4	30061737	8			ZNF664	DNAH10
rs12415501	chr10:105324774-105324774	T	0.0492	0.1359	0.1352	intron_variant	4	29892015	16
rs12426679	chr12:76237987-76237987	T	0.1241	0.1597	0.5119	intron_variant	4	27203392	4			PHLDA1
rs12591736	chr15:70454139-70454139	A	0.025	0.4216	0.1511	intron_variant , non_coding_transcript_variant	4	30061737	2			TLE3
rs12604076	chr17:76773638-76773638	C	0.2897	0.4107	0.5169	intergenic_variant	5	29892015	11	9	znf143	DNAH17-AS1	CYTH1
rs12614435	chr2:179489726-179489726	G	0.1967	0.4464	0.166	intron_variant	4	30061737	1		PLAG1,Spi1
rs12648245	chr4:174641184-174641184	T	0.041	0.117	0.083	3_prime_UTR_variant	2	29892015
rs12664873	chr6:122463191-122463191	G	0.053	0.3462	0.2744	intron_variant	4	29290336
rs12721225	chr3:148177338-148177338	T			0.003	intron_variant , non_coding_transcript_variant	4	30061737
rs1278493	chr3:135814009-135814009	A	0.938	0.2103	0.5308	intergenic_variant	5	28416818			IRF1	MSL2	PPP2R3A
rs12809354	chr12:32978437-32978437	C	0.0923	0.1111	0.1511	missense	1	23210602	1		ZNF354C	YARS2	PKP2
rs12810346	chr12:115091017-115091017	T	0.0098		0.1819	intron_variant	4	30061737				RBM19
rs12908004	chr15:80676925-80676925	G	0.1664	0.0446	0.175	intron_variant	4	29892015	1		ZNF263
rs12908437	chr15:99287375-99287375	C	0.2973	0.5635	0.6441	downstream_gene_variant	5	29892015	42		NFIC	MIR4714	IGF1R
rs12992412	chr2:148792665-148792665	T	0.3033	0.4891	0.3728	intron_variant ,non_coding_transcript_variant	4	29892015			STAT2_STAT1
rs13038095	chr20:46425576-46425576	T	0.1929	0.0159	0.1093	intron_variant ,non_coding_transcript_variant	4	29892015	5			SULF2
rs1307274	chr6:34240576-34240576	G	0.8646	0.8929	0.9453	intron_variant	4	29892015	29	4		C6orf1
rs13105878	chr4:111718147-111718147	A	0.0061		0.0944	intergenic_variant	5	20173747	2
rs13191450	chr6:122392136-122392136	C	0.093	0.3542	0.328	intron_variant ,non_coding_transcript_variant	4	29892015				GJA1
rs13195459	chr6:122403559-122403559	A	0.0643	0.3492	0.325	non_coding_transcript_exon_variant	6	29892015	3
rs13216675	chr6:122452329-122452329	C	0.0794	0.3472	0.2734	intergenic_variant	5	29892015	1
rs13219206	chr6:122414157-122414157	T	0.0598	0.3522	0.332	intergenic_variant	5	30061737
rs13376333	chr1:154814353-154814353	T	0.3003	0.0308	0.3042	intergenic_variant	5	25124494	10	1	NFATC2	ADAR	KCNN3
rs13385	chr5:139712878-139712878	A	0.0477	0.3056	0.2266	intergenic_variant	5	28416822	4		Gfi1	PFDN1	HBEGF
rs133902	chr22:26164079-26164079	T	0.9266	0.8254	0.4324	intron_variant	4	20173747	1
rs138311480	chr4:112454295-112454295	T	0.0015		0.0368	3_prime_UTR_variant	2	28416822
rs140185678	chr16:2003016-2003016	A	0.0015		0.0229	splice_region_variant ,intron_variant	1	29892015	15	4
rs140192228	chr16:1995499-1995499	T	0.0008			intergenic_variant	5	30061737	3
rs143269342	chr4:111654341-111654341	T	0.0008		0.0089	missense_variant	1	29892015
rs1443926	chr1:112461902-112461902	G	0.1868	0.002	0.2972	splice_donor_variant	1	30271950	10		IRF1	LOC643355	KCND3
rs1454934	chr12:32972940-32972940	T	0.0719	0.1151	0.1521	intergenic_variant	5	29892015	3	2	SOX10	YARS2	PKP2
rs145708722	chr3:148176916-148176916	C	0.0008			intron_variant	4	29892015
rs1458038	chr4:81164723-81164723	T	0.0371	0.3938	0.2694	intron_variant	4	28416818	5			ANTXR2
rs146311723	chr15:63804507-63804507	C	0.0091	0.001	0.1958	missense	1	29441892	31			USP3	USP3
rs146518726	chr1:51535039-51535039	A	0.0061		0.0298	intergenic_variant	5	29892015
rs147301839	chr15:57924714-57924714	C			0.005	intron_variant	4	29892015	4
rs148398509	chr15:73908126-73908126	C	0.0008		0.0099	downstream_gene_variant	5	29892015
rs149829837	chr4:111781006-111781006	A	0.0053		0.0596	missense_variant	1	30061737
rs153109	chr16:28530416-28530416	C	0.3555	0.381	0.3966	missense	1	24607718	27	6		ATXN2L	NPIPB8,IL27
rs1532170	chr4:112165212-112165212	G	0.143	0.25	0.4105	downstream_gene_variant	5	29892015
rs1545300	chr1:112464004-112464004	T	0.1906	0.002	0.2913	intron	4	28055231	25		REST,Rfx1,RFX2	LOC643355	KCND3
rs1563304	chr17:44874453-44874453	T	0.0113	0.002	0.1829	intergenic_variant	5	30061737	4
rs1675334	chr9:93653260-93653260	C	0.643	0.6895	0.5895	intron_variant	4	30061737	7	1		AUH	SYK
rs16899974	chr5:34998981-34998981	A	0.0461	0.4216	0.2266	intron_variant	4	30061737
rs16971436	chr16:73026661-73026661	G	0.1014	0.0992	0.0229	intron_variant	4	28416822
rs17005647	chr3:69406181-69406181	T	0.1195	0.5665	0.3101	missense	1		12			FRMD4B	FRMD4B
rs17042171	chr4:111708287-111708287	A	0.2542	0.4524	0.1551	missense	1	24983873	10
rs17059534	chr4:174444902-174444902	A	0.0998	0.0764		intron_variant	4	30061737	22	8		CEP44
rs17079881	chr6:118566187-118566187	G	0.1528	0.0308	0.1421	upstream_gene_variant	5	30110000
rs17375901	chr1:11852516-11852516	T	0.0197	0.002	0.0686	downstream_gene_variant	5	28416822	29	1
rs17380837	chr12:26345526-26345526	T	0.0991	0.369	0.3042	intron_variant	4	29892015
rs174048	chr5:142650404-142650404	C	0.1354	0.0853	0.1461	intron_variant	4	26497660				MIR5197
rs17461925	chr1:203026591-203026591	G	0.525	0.2321	0.3847	intron_variant	4	30061737	11	1		PPFIA4	PPFIA4
rs17490701	chr3:111587879-111587879	A	0.0076	0.0466	0.1153	downstream_gene_variant	5	29892015	25			PHLDB2	PHLDB2
rs17516287	chr7:116154186-116154186	G	0.4168	0.1567	0.34	intron_variant	4	28416822	3	1		CAV2
rs17570669	chr4:111736882-111736882	T	0.0053		0.0765	intron_variant	4	29892015	4
rs17576	chr20:43268865-43268865	G	0.3442	0.7391	0.3807	downstream_gene_variant	5	29892015
rs1801253	chr10:117564566-117564566	C	0.5703	0.7877	0.6849	intergenic_variant	5	29892015
rs1805087	chr1:237211799-237211799	G	0.2844	0.1052	0.173	missense	1	19665460
rs1805120	chr7:150346618-150346618	A	0.2511	0.622	0.2127	missense	1	22192668
rs1805123	chr7:150342621-150342621	G	0.0068	0.0536	0.2535	missense	1	17551576
rs1805127	chr21:37194118-37194118	C	0.7247	0.7083	0.6243	Synonymous Variant	6	19490382
rs1822273	chr11:20010513-20010513	A	0.5038	0.4891	0.7734	missense	1	18222980	50	1		NAV2	NAV2
rs187585530	chr1:10167425-10167425	A			0.001	missense	1	26066992	32			LZIC	UBE4B
rs187585530	chr1:10167425-10167425	A			0.001	intron_variant	4	31919934	32			LZIC	UBE4B
rs1957021	chr14:32924505-32924505	C	0.8933	0.3919	0.2127	intron_variant	4	29892015	1			AKAP6	AKAP6
rs1997572	chr7:116198828-116198828	G	0.3253	0.7252	0.6034	missense_variant	1	29892015	4			CAV2	CAV1
rs2012809	chr5:128190363-128190363	A	0.038	0.105	0.188	upstream_gene_variant	3	29892015		1
rs2031522	chr6:87821501-87821501	G	0.2504	0.4742	0.3698	intron_variant	4	29892015
rs2040862	chr5:137419989-137419989	T	0.0537	0.001	0.1541	intron_variant	4	28416818	13	1		WNT8A	WNT8A
rs2047036	chr10:105477163-105477163	T	0.7625	0.7083	0.6203	intron_variant	4	29892015	38			SH3PXD2A-AS1	SH3PXD2A
rs2106261	chr16:73051620-73051620	T	0.2905	0.2778	0.1789	downstream_gene_variant	5	30061737	32			ZFHX3	ZFHX3
rs210632	chr6:117880342-117880342	G	0.9766	0.5823	0.7763	intron_variant ,NMD_transcript_variant	4	22544366	6			ROS1	GOPC,DCBLD1
rs2109514	chr7:116159961-116159961	A	0.3646	0.7768	0.5239	intron_variant	4	28416822	4			CAV2
rs2129977	chr4:111712432-111712432	G	0.6702	0.2927	0.7565	intron_variant	4	30180182	1
rs2145274	chr20:6572014-6572014	C	0.118	0.0069	0.1054	downstream_gene_variant	5	29892015	24	1
rs2145587	chr14:32981484-32981484	A	0.1838	0.3631	0.2972	intergenic_variant	5	28416818	13			DTD2	AKAP6
rs2200733	chr4:111710169-111710169	T	0.2315	0.4514	0.1551	upstream_gene_variant	5	29892015	1
rs2220427	chr4:111714889-111714889	T	0.118	0.4524	0.1541	intergenic_variant	5	29892015	34
rs2274115	chr9:139094773-139094773	G	0.7723	0.4762	0.6769	intron_variant	4	29892015	19			UBAC1	LHX3
rs2286466	chr16:2014283-2014283	G	0.9939	0.8681	0.8091	upstream_gene_variant	5	17603472		93
rs2288327	chr2:179411665-179411665	G	0.289	0.63	0.172	upstream_gene_variant	5	28416822	2
rs2291437	chr12:24715048-24715048	G	0.4418	0.7788	0.1203	intron_variant	4	30061737	11	87
rs2296610	chr10:21157621-21157621	T		0.1736	0.0129	upstream_gene_variant	5	29892015				NEBL	NEBL
rs2306272	chr3:66434643-66434643	C	0.1513	0.7341	0.2922	intron_variant	4	29892015
rs2359171	chr16:73053022-73053022	A	0.2905	0.2728	0.1789	intron_variant	4	30061737	54	5		ZFHX3	ZFHX3
rs242557	chr17:44019712-44019712	A	0.3124	0.5685	0.3857	missense_variant	1	28416822	40	1		GOSR2	MAPT
rs244017	chr4:111255917-111255917	T	0.9047	0.7113	0.7893	missense_variant	1	29892015				ENPEP
rs2441380	chr2:61775364-61775364	C	0.6929	0.6597	0.6332	intron_variant	4	29892015
rs2540949	chr2:65284231-65284231	T	0.4085	0.3175	0.3867	intron_variant	4	29892015		123		SLC1A4	CEP68
rs2540953	chr2:65272362-65272362	A	0.8858	0.3165	0.5179	intergenic_variant	5	30061737	9			SLC1A4
rs2595104	chr4:111553133-111553133	G	0.4992	0.4782	0.6968	upstream_gene_variant	5	29892015	78	15		PITX2	PITX2
rs2625322	chr11:20010351-20010351	A	0.1498	0.5109	0.2247	intron_variant	4	29892015	51			NAV2	NAV2
rs2723064	chr2:65279805-65279805	C	0.4342	0.3095	0.3877	intron_variant , non_coding_transcript_variant	4	28416822	22	1		SLC1A4
rs2723334	chr4:111688752-111688752	C	0.4887	0.2857	0.7575	intron_variant	4	29892015
rs2738413	chr14:64679960-64679960	G	0.9319	0.7371	0.5457	intron_variant	4	29892015	10			SYNE2	SYNE2
rs2759301	chr15:80994288-80994288	A	0.0711	0.0417	0.4404	upstream_gene_variant	5	29892015	25	1		ABHD17C	ABHD17C
rs281868	chr6:118574061-118574061	A	0.4463	0.248	0.507	intergenic_variant	5	28416818	2
rs2834618	chr21:36119111-36119111	G	0.0635	0.1548	0.1113	intron_variant	4	29892015	6	2		LOC100506385	LINC01426
rs28387148	chr2:127433465-127433465	T	0.0045		0.1083	intron_variant	4	30061737
rs284277	chr1:10790797-10790797	A	0.3147	0.1567	0.6282	intron_variant	4	28416818	5			CASZ1	CASZ1
rs28439930	chr5:173393111-173393111	C	0.4826	0.3502	0.4414	intron_variant , non_coding_transcript_variant	4	29892015				BOD1
rs2860482	chr12:57105938-57105938	C	0.9092	0.745	0.7316	intron_variant	4	29892015				NACA	NACA
rs28631169	chr14:23888183-23888183	T	0.2859	0.001	0.1759	intron_variant	4	30061737	1			SLC22A17	MYH7,MIR208B
rs2885697	chr1:41544279-41544279	T	0.9002	0.6726	0.6869	downstream_gene_variant	5	30061737
rs2921421	chr15:57643886-57643886	C	0.6104	0.8194	0.996	downstream_gene_variant	5	29892015	3			CGNL1
rs295114	chr2:201195602-201195602	T	0.5151	0.2272	0.4185	intron_variant	4	29892015	14			SPATS2L	SPATS2L
rs2968863	chr7:150320224-150320224	T	0.0136	0.0536	0.2565	intron_variant	4	29892015	1			TMEM176B
rs30252	chr16:2005982-2005982	T	0.4622	0.5764	0.675	intergenic_variant	5	28416818	1
rs3176326	chr6:36647289-36647289	A	0.2073	0.1339	0.173	intron_variant	4	29892015	19	83		MIR3925	CDKN1A
rs332388	chr3:66411855-66411855	C	0.854	0.6925	0.4433	intergenic	5	24074973	1
rs337705	chr5:113737062-113737062	G	0.8313	0.1746	0.3887	upstream_gene_variant	5	29892015				KCNN2	KCNN2
rs337711	chr5:113748571-113748571	T	0.7519	0.1488	0.3887	intron_variant	4	29892015	13			KCNN2	KCNN2
rs34080181	chr3:66454191-66454191	A	0.1415	0.1905	0.3539	intron_variant	4	29892015	43
rs34245846	chr1:154831143-154831143	G	0.4115	0.0278	0.2624	intron_variant	4	30061737	7	4		ADAR	KCNN3
rs34292822	chr1:154812400-154812400	C	0.3411	0.0308	0.3101	intron_variant	4	28416818	47	1		ADAR	KCNN3
rs34750263	chr5:137434172-137434172	T	0.0658	0.3859	0.2674	intron_variant	4	30061737				WNT8A
rs34969716	chr6:18210109-18210109	A	0.0635	0.3264	0.2883	intron_variant	4	29290336	8	3
rs35005436	chr7:74134911-74134911	C	0.0477	0.0238	0.1531	intron_variant	4	29892015
rs35006907	chr8:125859817-125859817	A	0.0923	0.4722	0.337	downstream_gene_variant	5	29892015	42	9		MTSS1
rs35176054	chr10:105480387-105480387	A	0.084	0.002	0.1252	intron_variant	4	29892015	26			SH3PXD2A-AS1	SH3PXD2A
rs35349325	chr12:70097464-70097464	C	0.4221	0.2669	0.5139	intron_variant , non_coding_transcript_variant	4	30061737	1			PTPRB
rs35504893	chr2:179421294-179421294	T	0.2935	0.6905	0.1998	intron_variant , non_coding_transcript_variant	4	29892015	1
rs35544454	chr2:213266003-213266003	T	0.0605	0.0069	0.1839	intron_variant	4	29892015	1
rs35569628	chr13:113872712-113872712	C	0.1346	0.5466	0.2316	upstream_gene_variant	5	29892015	20
rs35620480	chr8:11499908-11499908	C	0.0386	0.001	0.1849	intron_variant	4	29892015	33	30		LINC00208
rs36004974	chr1:154818403-154818403	G	0.1104	0.0298	0.341	intron_variant	4	29892015	41	2		ADAR	KCNN3
rs373243633	chr8:144992108-144992108	G	0.261	0.3948	0.5567	intron_variant	4	30061737
rs3737883	chr1:203034906-203034906	G	0.261	0.3948	0.5567	intron_variant	4	17903304	6			PPFIA4	PPFIA4
rs3789967	chr12:124447339-124447339	G	0.5719	0.0853	0.3708	upstream_gene_variant	3	29892015	6			ZNF664	CCDC92
rs3807375	chr7:150364297-150364297	T	0.7587	0.7599	0.3449	intron_variant	4	28416818	33			TMEM176B	KCNH2
rs3807989	chr7:116186241-116186241	G	0.2958	0.7252	0.6064	missense_variant	1	29050564	20			CAV2	CAV1
rs3820888	chr2:201180023-201180023	C	0.1505	0.7252	0.3777	intron_variant	4	28460022	42	3		SPATS2L	SPATS2L
rs3822259	chr4:10118745-10118745	T	0.5129	0.4087	0.6014	intron_variant	4	29892015		124		WDR1	WDR1
rs3825214	chr12:115233247-115233247	A	0.7557	0.5744	0.8002	intron	4	19490382
rs3844438	chr17:68347338-68347338	T	0.267	0.6974	0.5239	intron_variant	4	22544366
rs3853445	chr4:111761487-111761487	C	0.0847	0.3115	0.2406	intron_variant	4	30061737	16	2
rs3903239	chr1:170569317-170569317	G	0.1536	0.621	0.4254	upstream_gene_variant	5	29892015
rs3951016	chr6:118559658-118559658	A	0.5159	0.751	0.4712	intron	4	27479212
rs3960788	chr4:103915618-103915618	C	0.8434	0.5119	0.4175	intron_variant , non_coding_transcript_variant	4	29892015				UBE2D3	SLC9B1
rs4073778	chr1:116297758-116297758	A	0.1135	0.3056	0.5755	intergenic_variant	5	29892015	12			VANGL1	CASQ2
rs422068	chr14:23864804-23864804	C	0.6369	0.1677	0.338	intron_variant , non_coding_transcript_variant	4	22544366				SLC22A17	MYH6
rs4355822	chr8:141746324-141746324	A	0.8903	0.6577	0.4821	intron_variant	4	30061737	3			SLC45A4	PTK2
rs4385527	chr9:97648587-97648587	A	0.0998	0.1746	0.3956	intron_variant	4	29892015	23			MIR2278	C9orf3
rs4404097	chr16:73032032-73032032	A	0.0091	0.3085	0.159	intron_variant	4	30061737	11			ZFHX3	ZFHX3
rs4484922	chr1:116310818-116310818	C	0.4879	0.5159	0.2922	intron_variant	4	30061737	1	15		VANGL1	CASQ2
rs4499262	chr16:73059159-73059159	A	0.1498	0.256	0.1799	intron_variant	4	29892015	50	4		ZFHX3	ZFHX3
rs4574581	chr5:89925895-89925895	G	0.9501	0.8343	0.6889	intron_variant	4	30678657
rs4590732	chr1:203028711-203028711	G	0.5166	0.3998	0.5567	intron_variant	4	29892015	10	2		PPFIA4	PPFIA4
rs4590838	chr11:97867665-97867665	C	0.5613	0.9236	0.8489	intron_variant	4	29290336	3
rs4611994	chr4:112632196-112632196	C	0.2542	0.4524	0.1551	intron_variant	4	29892015
rs4615152	chr4:174599459-174599459	C	0.7973	0.4881	0.7744	intron_variant	4	28416818
rs4642101	chr3:12842223-12842223	G	0.7345	0.2897	0.6859	intron_variant	4	29892015	4			TMEM40	CAND2
rs4647602	chr4:186490954-186490954	T	0.0219	0.6022	0.0716	intergenic_variant	5	17903304		126		ENPP6	PRIMPOL,CASP3,CCDC111
rs464901	chr22:18597502-18597502	C	0.6641	0.2956	0.326	intergenic	5	28087289	33	2		TUBA8	TUBA8
rs465276	chr22:18600583-18600583	A	0.768	0.299	0.372	downstream_gene_variant	5	29892015	4			TUBA8	TUBA8
rs4743034	chr9:109632353-109632353	A	0.4327	0.1935	0.2217	intergenic_variant	5	28460022	51	1
rs4766566	chr12:111706877-111706877	T	0.8336	0.7252	0.2694	intron_variant	4	27203392	1			CUX2	CUX2
rs4776472	chr15:70006873-70006873	A	0.0401	0.6687	0.2465	intron	4	25662045	26	2		MIR629
rs4845625	chr1:154394542-154394542	C	0.7065	0.4266	0.5487	intron_variant	4	30061737				IL6R	IL6R
rs4855074	chr3:179168462-179168462	T	0.0877	0.1974	0.1213	intron_variant	4	29892015	10	93		GNB4	GNB4
rs4855075	chr3:179170494-179170494	T	0.0885	0.1736	0.1213	intron_variant	4	29892015	23	9		GNB4	GNB4
rs4871397	chr8:124635197-124635197	C	0.9297	0.9028	0.9364	intron_variant	4	28416822	14			FBXO32
rs4935786	chr11:121661507-121661507	A	0.1649	0.7937	0.6998	intron_variant , non_coding_transcript_variant	4	17903304	1
rs4951258	chr1:205691316-205691316	A	0.2307	0.3512	0.4026	intron	4	24940886
rs4951261	chr1:205717823-205717823	C	0.2322	0.3512	0.4026	intron_variant	4	29892015		118		IKBKE	NUCKS1
rs4963776	chr12:24779491-24779491	T	0.0219	0.1429	0.1789	upstream_gene_variant	5	29892015				LINC00477
rs4965430	chr15:99268850-99268850	G	0.295	0.5308	0.6402	intron_variant , non_coding_transcript_variant	4	29892015	23			MIR4714	IGF1R
rs4977397	chr9:20235004-20235004	G	0.857	0.8681	0.4195	intron_variant , non_coding_transcript_variant	4	30061737				IFNW1
rs4999127	chr1:154714006-154714006	A	0.938	0.999	0.8499	intron_variant	4	30061737	10			ADAR	KCNN3
rs503706	chr1:170635084-170635084	C	0.8094	0.3909	0.5785	intron_variant	4	29892015	13	9
rs5063	chr1:11967704-11967704	T	0.0613	0.1151	0.0348	intergenic_variant	5	30061737
rs5065	chr1:11966124-11966124	G	0.4183	0.0129	0.1233	upstream_gene_variant	5	30061737
rs520525	chr1:170638333-170638333	G	0.1823	0.2996	0.2913	intergenic_variant	5	29892015	19	5
rs5443	chr12:7064037-7064037	T	0.8192	0.503	0.3072	intron_variant	4	29892015
rs55693294	chr10:105277474-105277474	T	0.0204		0.0656	intron_variant	4	29892015	2
rs55734480	chr7:14372009-14372009	A	0.028	0.3413	0.2356	missense	1	25452597	1			RPA3	DGKB
rs55754224	chr4:114428714-114428714	T	0.1513	0.0883	0.2744	nonsense	1	20543198				CAMK2D	CAMK2D
rs55985730	chr7:128417044-128417044	G	0.0023		0.0567	intron_variant	4	28416818	3			FAM71F2	OPN1SW
rs56181519	chr2:175555714-175555714	T	0.354	0.0407	0.2863	synonymous_variant ,	6	15389246	1			WIPF1
rs56201652	chr7:92278116-92278116	A	0.3737	0.0218	0.3131	intron_variant	4	30061737	12			CDK6	CDK6
rs56202902	chr1:50991452-50991452	C	0.0008		0.0199	intron_variant	4	29892015
rs577676	chr1:170587340-170587340	T	0.8427	0.378	0.4622	intron_variant	4	29892015	14
rs60212594	chr10:75414344-75414344	C	0.2012	0.1587	0.1372	downstream_gene_variant	5	29892015	4	3
rs60572254	chr10:105324774-105324774	T	0.049	0.136	0.135	intron_variant	4	29892015
rs60848348	chr10:105321881-105321881	T	0.2095	0.1548	0.1819	upstream_gene_variant	5	29892015
rs608930	chr1:170617306-170617306	T	0.8064	0.378	0.5736	intron_variant	4	30061737
rs60902112	chr3:194800853-194800853	T	0.3427	0.627	0.2048	intron_variant	4	29290336	53	1		FAM43A	XXYLT1
rs61303432	chr4:111710542-111710542	T	0.2368	0.4514	0.1551	intron_variant , non_coding_transcript_variant	4	28416818
rs61501369	chr4:111524629-111524629	T	0.0439	0.2827	0.2296	intron_variant	4	29892015	2
rs62011291	chr15:63800013-63800013	G	0.0113	0.001	0.2545	intron_variant	4	28416822	47	11		USP3	USP3
rs62133983	chr2:69976384-69976384	T	0.4228	0.7202	0.4662	intron_variant	4	28416818	6			ANXA4	ANXA4
rs62483627	chr7:106856002-106856002	A	0.0741	0.2986	0.2604	downstream_gene_variant	5	29892015
rs62521286	chr8:124551975-124551975	G	0.0991		0.0537	intron_variant	4	29892015	20	48		FBXO32	FBXO32
rs639652	chr1:170612873-170612873	A	0.5083	0.377	0.5646	upstream_gene_variant	5	28416818	1
rs6455	chr6:32006896-32006896	A	0.0219			intron_variant	4	30061737	1	1		HLA-DMB	CYP21A2
rs6462078	chr7:28413187-28413187	A	0.6936	0.998	0.7922	intron_variant , non_coding_transcript_variant	4	30061737
rs6462079	chr7:28415827-28415827	A	0.6936	0.998	0.7922	intron_variant	4	29892015
rs6480708	chr10:75420114-75420114	A	0.7035	0.3393	0.159	intron_variant	4	28416818	2
rs6490029	chr12:111698457-111698457	A	0.6967	0.7143	0.2416	intron_variant	4	29892015				CUX2	CUX2
rs6499600	chr16:73013272-73013272	T	0.6611	0.4444	0.4583	intron_variant	4	29892015	15			ZFHX3	ZFHX3
rs651386	chr1:170591310-170591310	T	0.5121	0.378	0.4523	intron_variant , non_coding_transcript_variant	4	28416822	1
rs6546550	chr2:70038232-70038232	G	0.91	0.6696	0.4573	synonymous_variant	6	26385043	1			ANXA4	ANXA4
rs6546553	chr2:70111711-70111711	A	0.7663	0.5476	0.4443	intron_variant	4	29892015	2			ANXA4
rs6546620	chr2:26159940-26159940	C	0.6006	0.1042	0.7903	intron_variant	4	30061737	15	1		ASXL2	KIF3C
rs6560886	chr12:133150210-133150210	C	0.9622	0.9663	0.8091	intron_variant	4	29892015	3			FBRSL1	FBRSL1
rs6580277	chr5:142818123-142818123	G	0.2254	0.0268	0.2197	intron_variant	4	25124494
rs6584555	chr10:105299611-105299611	C	0.5348	0.1617	0.1511	intron	4	24983873	3
rs6596717	chr5:106427609-106427609	A	0.9009	0.751	0.6054	intron_variant , non_coding_transcript_variant	4	28416818
rs6666258	chr1:154814268-154814268	C	0.3911	0.0308	0.3042	intron_variant	4	28416818	10	1		ADAR	KCNN3
rs6689306	chr1:154395946-154395946	G	0.7239	0.4375	0.5577	upstream_gene_variant	5	29892015	80	3		IL6R	IL6R
rs67249485	chr4:111699685-111699685	T	0.3018	0.7063	0.2445	intron_variant	4	29892015
rs6742276	chr2:61768745-61768745	A	0.5787	0.6567	0.6332	intron_variant	4	30061737	2
rs6747542	chr2:70106832-70106832	C	0.59	0.6696	0.4612	upstream_gene_variant	5	30061737				ANXA4	GMCL1
rs6771054	chr3:89489529-89489529	C	0.6528	0.2589	0.4056	intron_variant	4	27203392	2
rs6790396	chr3:38771925-38771925	G	0.8608	0.7927	0.5835	intergenic_variant	5	29892015	10			SCN10A	SCN10A
rs67969609	chr2:145760353-145760353	G	0.0772	0.7897	0.0656	intron_variant	4	22544366
rs6800541	chr3:38816322-38816322	T	0.9478	0.8353	0.5885	intron_variant	4	30061737	1			SCN10A	SCN10A
rs6810325	chr3:12840934-12840934	C	0.8313	0.2927	0.6998	intergenic_variant	5	30061737	5	2		TMEM40	CAND2
rs6817105	chr4:111705768-111705768	C	0.2511	0.4524	0.1551	upstream_gene_variant	5	29892015	4
rs6829664	chr4:114448656-114448656	G	0.0756	0.0813	0.2773	3_prime_UTR_variant	2	30061737				CAMK2D	CAMK2D
rs6843082	chr4:111718067-111718067	A	0.6884	0.2867	0.7465	intron_variant	4	30061737	2
rs6847935	chr4:111696651-111696651	T	0.3079	0.7063	0.2416	intron_variant	4	29892015	1
rs6850025	chr4:111596360-111596360	A	0.0552	0.1319	0.0606	intron_variant , non_coding_transcript_variant	4	29892015	1
rs6864727	chr5:137247940-137247940	C	0.354	0.3859	0.2684	intron	4	25691686
rs6882776	chr5:172664163-172664163	A	0.3487	0.6339	0.2704	intron_variant	4	29892015	23	3		DUSP1	NKX2-5
rs6891790	chr5:172670745-172670745	T	0.6543	0.6012	0.2744	upstream_gene_variant	5	22544366	11	3		DUSP1
rs6907805	chr6:87856003-87856003	T	0.6346	0.6032	0.4672	intron_variant	4	30061737		3
rs6993266	chr8:141762659-141762659	A	0.9728	0.6577	0.494	non_coding_transcript_exon_variant	6	26497660	1			SLC45A4	PTK2
rs6994744	chr8:141740868-141740868	C	0.8495	0.6389	0.4751	intergenic_variant	5	29892015				SLC45A4	PTK2
rs6998692	chr8:21805265-21805265	C	0.5159	0.0893	0.1451	intergenic_variant	5	30061737	3			DOK2	XPO7
rs7026071	chr9:97492520-97492520	C	0.9009	0.7579	0.6044	intron_variant	4	28416818				C9orf3	C9orf3
rs7096385	chr10:69664881-69664881	C	0.8411	0.6885	0.9225	upstream_gene_variant	5	29892015	5			ATOH7	SIRT1
rs71454237	chr12:70013415-70013415	A	0.0734	0.3085	0.2286	upstream_gene_variant	5	29892015	2
rs7164883	chr15:73652174-73652174	G	0.3321	0.1101	0.16	upstream_gene_variant	5	29892015	5
rs716845	chr5:113736416-113736416	A	0.0825	0.1042	0.2674	intron_variant	4	29892015				KCNN2	KCNN2
rs7170477	chr15:64103777-64103777	A	0.177	0.005	0.3231	intron_variant , NMD_transcript_variant	4	30061737	6			HERC1	HERC1
rs7172038	chr15:73667255-73667255	G	0.3941	0.0347	0.16	intron_variant	4	29892015	13
rs7183206	chr15:73669006-73669006	A	0.2534	0.0347	0.1531	intron_variant	4	29892015	1
rs7193343	chr16:73029160-73029160	C	0.7474	0.369	0.826	intron_variant	4	30061737	23			ZFHX3	ZFHX3
rs7219869	chr17:68337185-68337185	G	0.4077	0.6131	0.4722	upstream_gene_variant	5	30061737
rs7225165	chr17:1309850-1309850	A	0.0469	0.1052	0.1133	intron_variant	4	22544366	1			BHLHA9
rs7269123	chr20:61157939-61157939	T	0.6203	0.4762	0.4245	intron_variant	4	29892015	12
rs72700114	chr1:170193825-170193825	C	0.0877	0.0208	0.0626	intron_variant	4	30061737	1
rs72700118	chr1:170194823-170194823	A	0.0023	0.003	0.0994	upstream_gene_variant	3	29892015	9
rs72811294	chr17:12618680-12618680	C	0.2057	0.0764	0.1153	upstream_gene_variant	5	28416818	8
rs72926475	chr2:86594487-86594487	A	0.1967	0.0079	0.1173	intron_variant	4	19597491	15
rs73032363	chr3:24472866-24472866	G	0.1044	0.3522	0.3022	intron_variant , non_coding_transcript_variant	4	29892015				THRB	THRB
rs73041705	chr3:24463235-24463235	C	0.093	0.3552	0.3052	upstream_gene_variant	5	30061737				THRB	THRB
rs73228543	chr3:111592838-111592838	A	0.0045	0.005	0.1163	intron_variant , non_coding_transcript_variant	4	29892015	32			PHLDB2	PHLDB2
rs73241997	chr14:35173775-35173775	T	0.4902	0.2054	0.1461	intron_variant , non_coding_transcript_variant	4	29892015				CFL2
rs73366713	chr6:16415751-16415751	A	0.1309	0.0099	0.1312	intron_variant , non_coding_transcript_variant	4	28416818	10			ATXN1	ATXN1
rs7373065	chr3:38710315-38710315	C	0.9992	1	0.9761	intron_variant	4	29892015
rs7374540	chr3:38634142-38634142	A	0.1831	0.4732	0.6024	downstream_gene_variant	5	29892015				SCN5A	SCN5A
rs7394190	chr10:75421648-75421648	A	0.7829	0.3482	0.166	intron_variant	4	29892015	9
rs74022964	chr15:73677264-73677264	T	0.2262	0.0347	0.159	intron_variant	4	30061737
rs7460121	chr8:135812416-135812416	A	0.0923	0.001	0.0765	intron_variant	4	29892015	19			ZFAT	MIR30B
rs74884082	chr14:73249419-73249419	T	0.2753	0.2282	0.2416	downstream_gene_variant	5	29892015	7			DPF3	DPF3
rs74910854	chr7:74110705-74110705	G	0.0061	0.0238	0.0825	intron_variant	4	29892015
rs75021220	chr4:111658394-111658394	T	0.2995	0.4058	0.1551	intergenic_variant	5	29892015
rs7508	chr8:17913970-17913970	A	0.9516	0.5516	0.6928	intron_variant	4	29892015	2
rs75190942	chr11:128764571-128764571	A	0.0454	0.0913	0.0736	intron_variant	4	28416818	23			KCNJ5	KCNJ5
rs7529220	chr1:22282619-22282619	C	0.5219	0.7599	0.8608	intergenic_variant	5	29892015	91	3		USP48
rs7557600	chr2:48772202-48772202	C	0.2708	0.3175	0.1571	intron_variant	4	30678657
rs7578393	chr2:26165528-26165528	C	0.5113	0.0992	0.7903	intron_variant	4	29892015				ASXL2	KIF3C
rs76097649	chr11:128764570-128764570	A	0.0446	0.0913	0.0736	downstream_gene_variant	5	29892015	23			KCNJ5	KCNJ5
rs7612445	chr3:179172979-179172979	T	0.3933	0.1746	0.174	intron_variant	4	29892015	13	1		GNB4
rs762624	chr6:36645588-36645588	C	0.5212	0.5992	0.2376	intron_variant	4	29892015	67	25		MIR3925	CDKN1A
rs7632427	chr3:89534377-89534377	C	0.6331	0.1974	0.4056	intergenic_variant	5	29892015
rs7650482	chr3:12841804-12841804	G	0.9281	0.2897	0.6859	3_prime_UTR_variant	2	29892015	7	2		TMEM40	CAND2
rs76774446	chr17:45046368-45046368	A	0.0076	0.001	0.16	intron_variant	4	28416818	2			STH
rs76774446	chr1:10796866-10796866	A	0.0076	0.001	0.16	intron_variant	4	31919934	2			STH
rs7687819	chr4:113329345-113329345	G	0.1808	0.2798	0.2485	intron_variant , non_coding_transcript_variant	4	30061737	1			NEUROG2	ALPK1
rs7689774	chr4:111703510-111703510	T	0.3094	0.7073	0.2445	intron_variant	4	29892015	1
rs7689774	chr4:111703510-111703510	T	0.3094	0.7073	0.2445	intergenic_variant	5	29290336	1
rs7698692	chr4:174604104-174604104	A	0.7073	0.5744	0.9632	intron_variant	4	29892015	1
rs77316573	chr16:2265271-2265271	T	0.0106	0.3581	0.1561	upstream_gene_variant	3	30061737		121
rs775498	chr12:70071513-70071513	G	0.0492	0.4187	0.2783	intron_variant	4	29892015
rs7770062	chr6:16413625-16413625	A	0.1354	0.0129	0.1312	downstream_gene_variant	5	29892015	19	18		ATXN1	ATXN1
rs77831929	chr4:111703510-111703510	T	0.309	0.707	0.245	intergenic_variant	5	30061737
rs7789146	chr7:150661409-150661409	A	0.3616	0.3065	0.165	intron_variant	4	29892015	34	2		TMEM176B	KCNH2
rs78332318	chr8:124546102-124546102	T	0.0015		0.0517	downstream_gene_variant	5	29892015	10	1		FBXO32	FBXO32
rs7834729	chr8:21821778-21821778	T	0.4962	0.0724	0.1412	intron_variant	4	30061737	4			DOK2	XPO7
rs7846485	chr8:21803735-21803735	A	0.5008	0.0893	0.1451	intergenic_variant	5	29290336	2	1		DOK2	XPO7
rs79187193	chr1:147255831-147255831	A	0.0537		0.0537	intergenic_variant	5	28416822				GJA5
rs7919685	chr10:65315800-65315800	T	0.5265	0.2778	0.4851	downstream_gene_variant	5	30061737	16	1		REEP3	REEP3
rs79399769	chr4:111925656-111925656	T	0.003		0.0298	intron_variant	4	30061737	1
rs7978685	chr12:57103154-57103154	C	0.9092	0.745	0.7316	intron_variant	4	29892015	4			NACA
rs7978685	chr12:57103154-57103154	T	0.9092	0.745	0.7316	downstream_gene_variant	5	29892015	4			NACA
rs7987944	chr13:23371474-23371474	C	0.152	0.1379	0.3519	intergenic_variant	5	29290336				MICU2
rs8073937	chr17:7435040-7435040	A	0.6309	0.6181	0.662	intron_variant	4	29892015	1			TNFSF12-TNFSF13
rs8073937	chr17:7435040-7435040	G	0.6309	0.6181	0.662	downstream_gene_variant	5	29892015	1			TNFSF12-TNFSF13
rs8088085	chr18:48708548-48708548	C	0.1445	0.2202	0.4384	intron_variant	4	29892015	9
rs8181996	chr14:77427469-77427469	C	0.0272	0.7054	0.5716	intron_variant	4	30061737	68	7		IRF2BPL
rs868155	chr6:122389906-122389906	T	0.1974	0.3542	0.328	intron_variant	4	29892015	4			GJA1
rs868155	chr6:122389906-122389906	T	0.1974	0.3542	0.328	intergenic_variant	5	29892015	4			GJA1
rs876727	chr16:73067761-73067761	G	0.1717	0.3175	0.2256	intron_variant , non_coding_transcript_variant	4	29892015	71	3		ZFHX3	ZFHX3
rs880315	chr1:10796866-10796866	C	0.1649	0.6359	0.3569	intron_variant	4	29892015	35			CASZ1	CASZ1
rs883079	chr12:114793240-114793240	T	0.6619	0.4157	0.7147	intergenic_variant	5	30061737	3
rs883079	chr12:114793240-114793240	C	0.6619	0.4157	0.7147	3_prime_UTR_variant	2	29892015	3
rs9401451	chr6:122099152-122099152	A	0.2844	0.4345	0.1074	downstream_gene_variant	5	29892015
rs9481842	chr6:118974798-118974798	G	0.4622	0.0645	0.2555	upstream_gene_variant	5	29892015	3
rs949078	chr11:121629007-121629007	T	0.1604	0.7877	0.7237	downstream_gene_variant	5	29892015	2
rs9506925	chr13:23368943-23368943	T	0.0151	0.001	0.2853	intron_variant	4	29892015	3
rs951366	chr1:205685352-205685352	C	0.2315	0.3502	0.4026	intron_variant , non_coding_transcript_variant	4	29892015	13			ELK4	NUCKS1
rs9563027	chr13:51708406-51708406	C	0.556	0.4216	0.3042	intron_variant	4	30678657
rs9580438	chr13:23373406-23373406	C	0.1528	0.1171	0.3519	intergenic_variant	5	29892015				MICU2
rs958546	chr13:46833717-46833717	C	0.3343	0.3423	0.3052	intron_variant	4	30061737				LCP1	LRRC63
rs9675122	chr17:7420294-7420294	G	0.3472	0.6181	0.659	intron_variant	4	29892015				TNFSF12-TNFSF13
rs9872035	chr3:196494702-196494702	T	0.2844	0.2222	0.5358	3_prime_UTR_variant	2	29892015	1			PIGX	PAK2
rs9899183	chr17:7452977-7452977	T	0.7345	0.999	0.7465	intergenic_variant	5	30061737	14	96		TNFSF12-TNFSF13	TNFSF12,TNFSF12-TNFSF13
rs9953366	chr18:46474192-46474192	C	0.9357	0.375	0.6948	intron_variant	4	29892015	25	63
rs9963878	chr18:48679522-48679522	C	0.4289	0.1746	0.0934	intron_variant , non_coding_transcript_variant	4	29892015	22	1
